# Supplementary material for: Synthesis, characterization and antitumor activity of novel tetrapodal 1,4-dihydropyridines: p53 induction, cell cycle arrest and low damage effect on normal cells induced by genotoxic factor H2O2
Source: Royal Society of Chemistry journal article supplement (doi:10.1039/c6ra04974e), 2016-01-01
Supplement: c6ra04974e1.pdf [file c6ra04974e1.pdf]

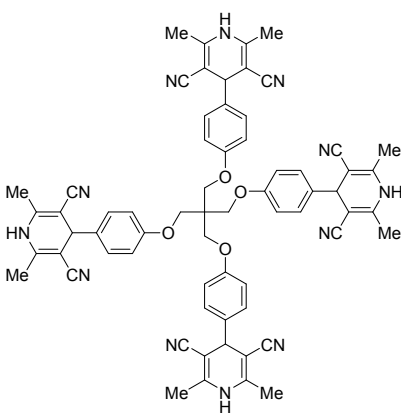

5a

EsmeeIAbdelshafy-AH22-DMSO-H  
Archive directory: /export/home/vnmr1/vnmrsys/data  
Sample directory: D05m\_test\_12Mar2014-21:34:40  
File: PR0709  
Pulse Sequence: s2pu1  
Solvent: DMSO  
Temp: 30.0 C / 303.1 K  
Mercury-300SB "NMR300"  
Relax. delay 1.000 sec  
Pulse 45.0 degrees  
Acq. time 4.853 sec  
Width 6600.7 Hz  
6 repetitions  
OBSERVE H1, 300.0687873 MHz  
DATA PROCESSING  
FT size 65536  
Total time 43 min, 34 sec  
Date: Apr 28 2015

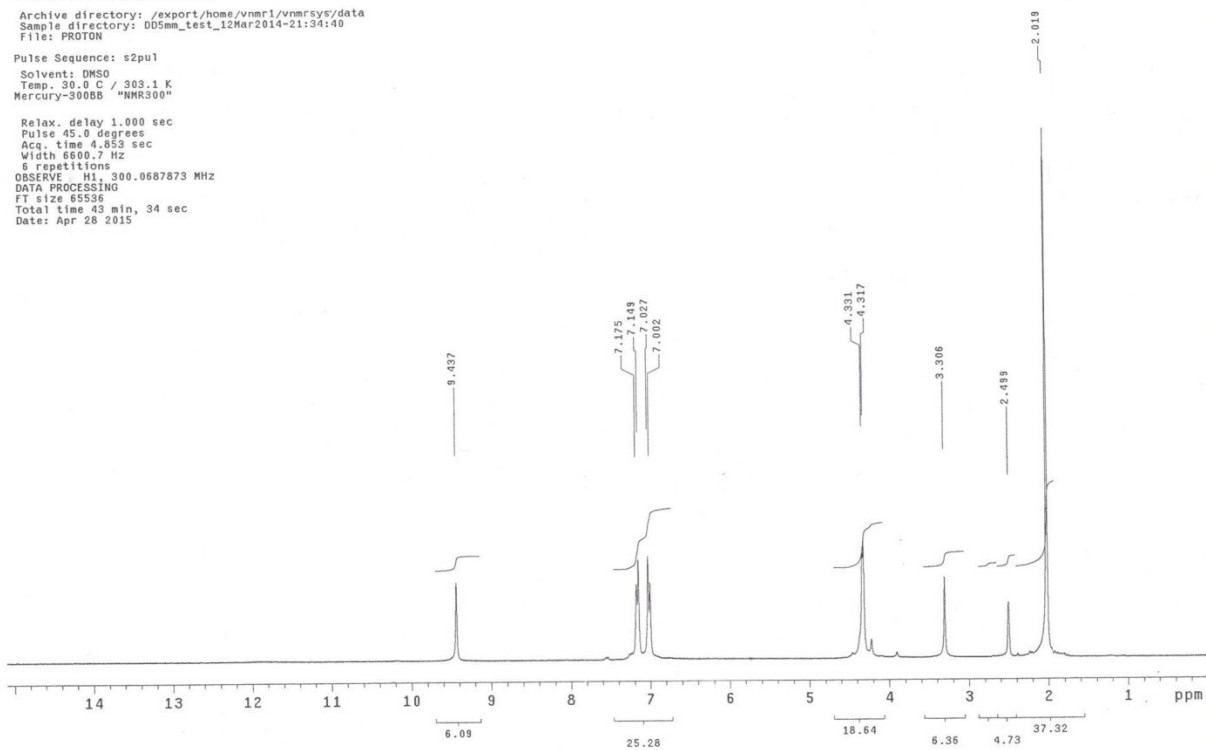

**<sup>1</sup>H NMR spectrum of compound 5a**

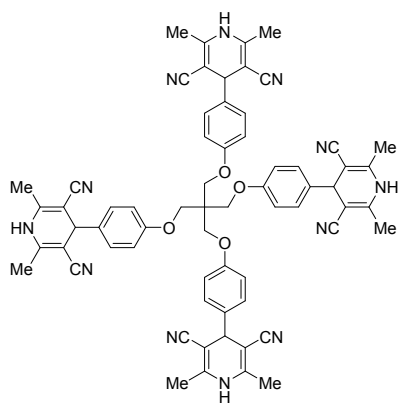

5a

IsmaeelAbdulahafy-A22-DMSO-13C  
 Archive directory: /export/home/vnmr1/vnmrns/data  
 Sample directory: DD5mm\_test\_12Mar2014-21:34:40  
 File: PROTON  
 Pulse Sequence: s2pu1  
 Solvent: DMSO  
 Temp. 30.0 C / 303.1 K  
 Mercury-300BB "NMR300"  
 Pulse 45.0 degrees  
 Acq. time 1.815 sec  
 Width 18761.7 Hz  
 868 repetitions  
 OBSERVE C13, 75.4523954 MHz  
 DECOUPLE H1, 300.0702830 MHz  
 Power 33 dB  
 continuously on  
 WALTZ-16 modulated  
 DATA PROCESSING  
 Line broadening 1.0 Hz  
 FT size 131072  
 Total time 3 hr, 17 min, 51 sec  
 Date: Apr 29 2015

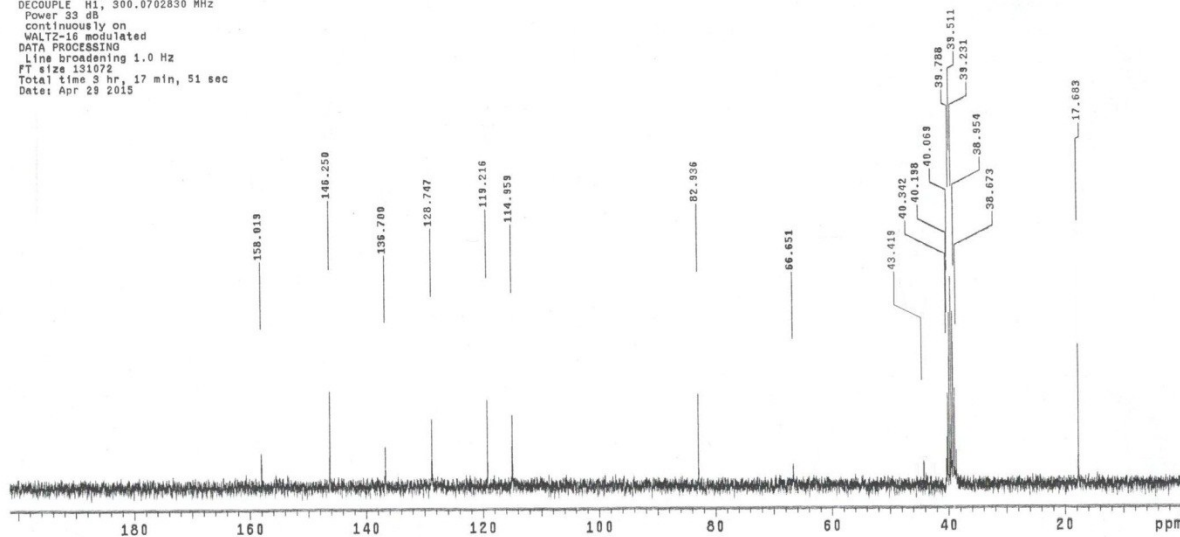

<sup>13</sup>CNMR spectrum of compound 5a

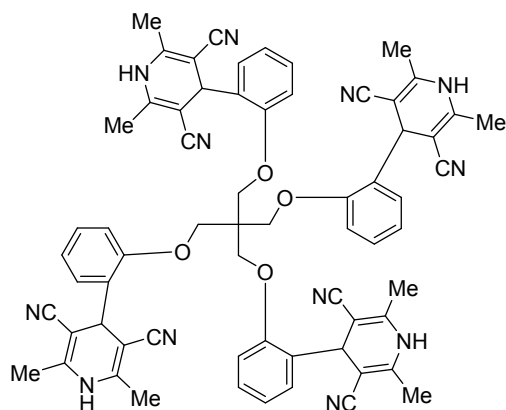

5b

AhmadFathy-A21-DMSO-H1

Archive directory: /export/home/vnmr1/vnmrsys/data  
 Sample directory: D05mm\_Test\_12Mar2014-21:34:40  
 File: PROTON

Pulse Sequence: s2pu1  
 Solvent: DMSO  
 Temp: 30.0 C / 303.1 K  
 Mercury-300BB "NMR300"

Relax. delay 1.000 sec  
 Pulse 45.0 degrees  
 Acq. time 4.853 sec  
 Width 6600.7 Hz  
 22 repetitions  
 OBSERVE H1, 300.0687871 MHz  
 DATA PROCESSING  
 FI size 85536  
 Total time 43 min, 34 sec  
 Date: Oct 11 2015

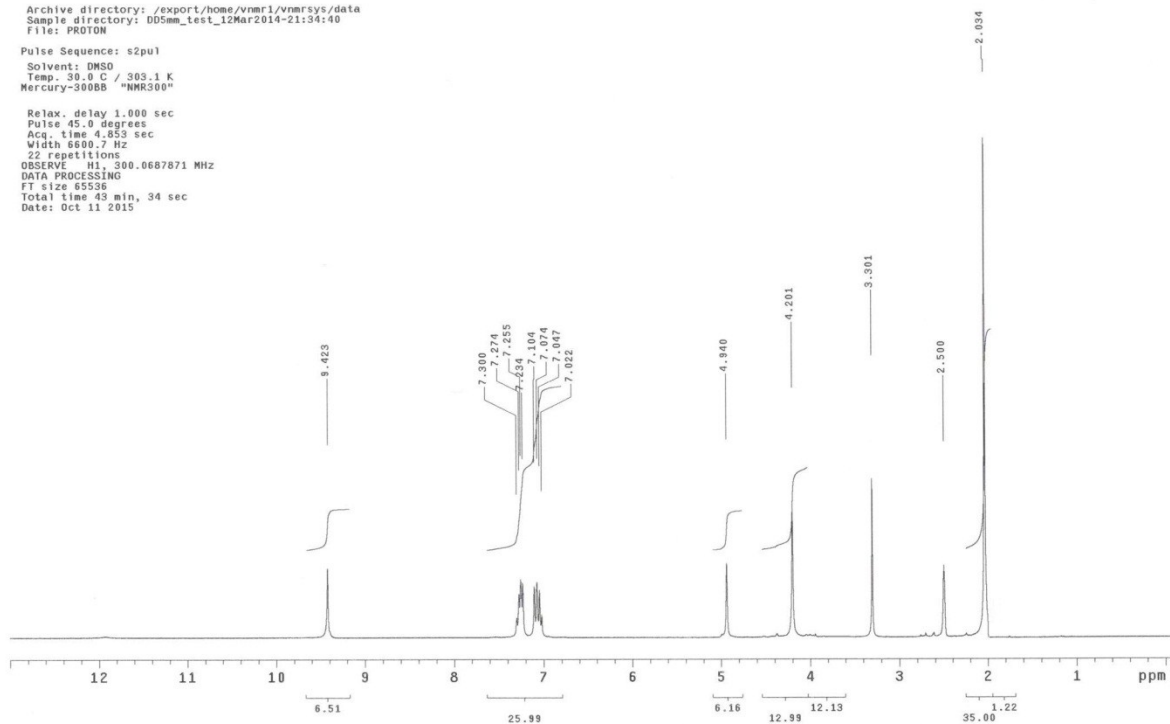

<sup>1</sup>H NMR spectrum of compound 5b

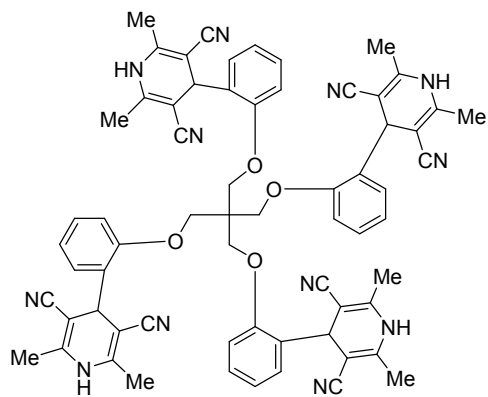

5b

AhmadFathy-A21-DMSO-C13  
 Archive directory: /export/home/vnmr1/vnmrsys/data  
 Sample directory: DD5mm\_test\_12Mar2014-21:34:40  
 File: PROTON  
 Pulse Sequence: s2pul  
 Solvent: DMSO  
 Temp: 30.0 C / 303.1 K  
 Mercury-300BS "NMR300"

Pulse 45.0 degrees  
 Acq. time 1.815 sec  
 Width 18761.7 Hz  
 1288 repetitions  
 OBSERVE C13, 75.4523968 MHz  
 DECOUPLE H1, 300.0702830 MHz  
 Power 33 dB  
 continuous by on  
 WALTZ-16 modulated  
 DATA PROCESSING  
 Line broadening 1.0 Hz  
 FT size 131072  
 Total time 3 hr, 17 min, 51 sec  
 Date: Oct 12 2015

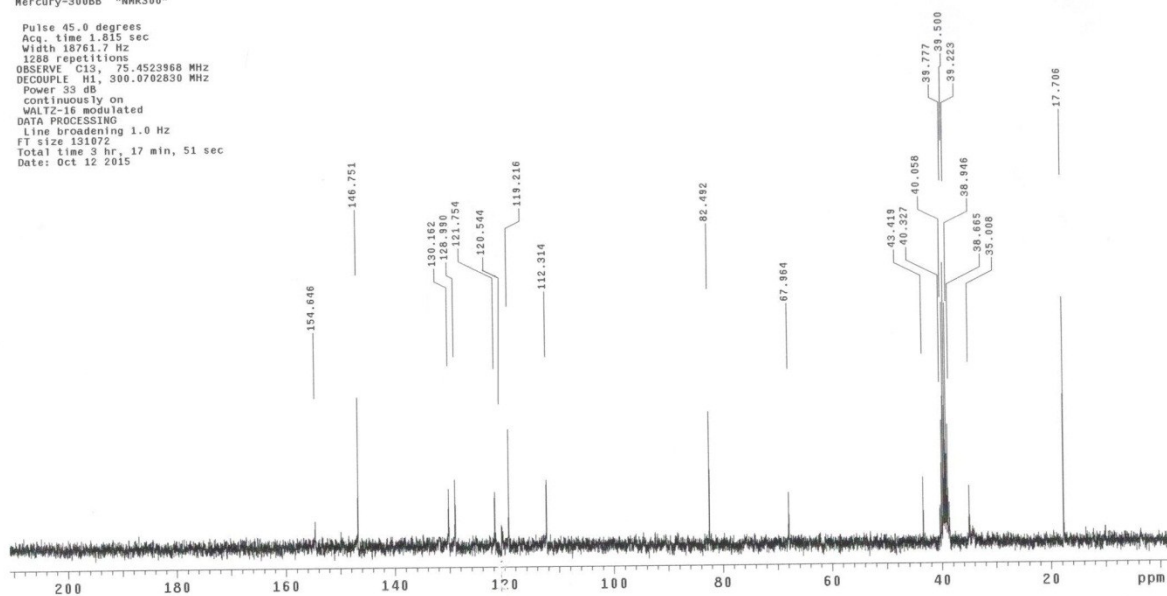

<sup>13</sup>C NMR spectrum of compound 5b

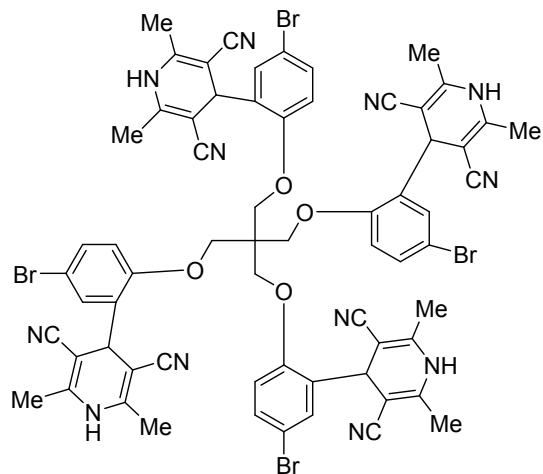

5c

AhmedHelmy-A3-DMSO-H1  
 Archive directory: /export/home/vnmr1/vnmrsys/data  
 Sample directory: D05mm\_test\_12Mar2014-21:34:40  
 File: PROTON  
 Pulse Sequence: s2pu1  
 Solvent: DMSO  
 Temp: 30.0 C / 303.1 K  
 Mercury-300BB "NMR300"  
 Relax. delay 1.000 sec  
 Pulse 45.0 degrees  
 Acq. time 4.553 sec  
 Width 6600.7 Hz  
 30 repetitions  
 OBSERVE H1, 300.0687871 MHz  
 DATA PROCESSING  
 FT size 85536  
 Total time 21 min, 7 sec  
 Date: Apr 21 2015

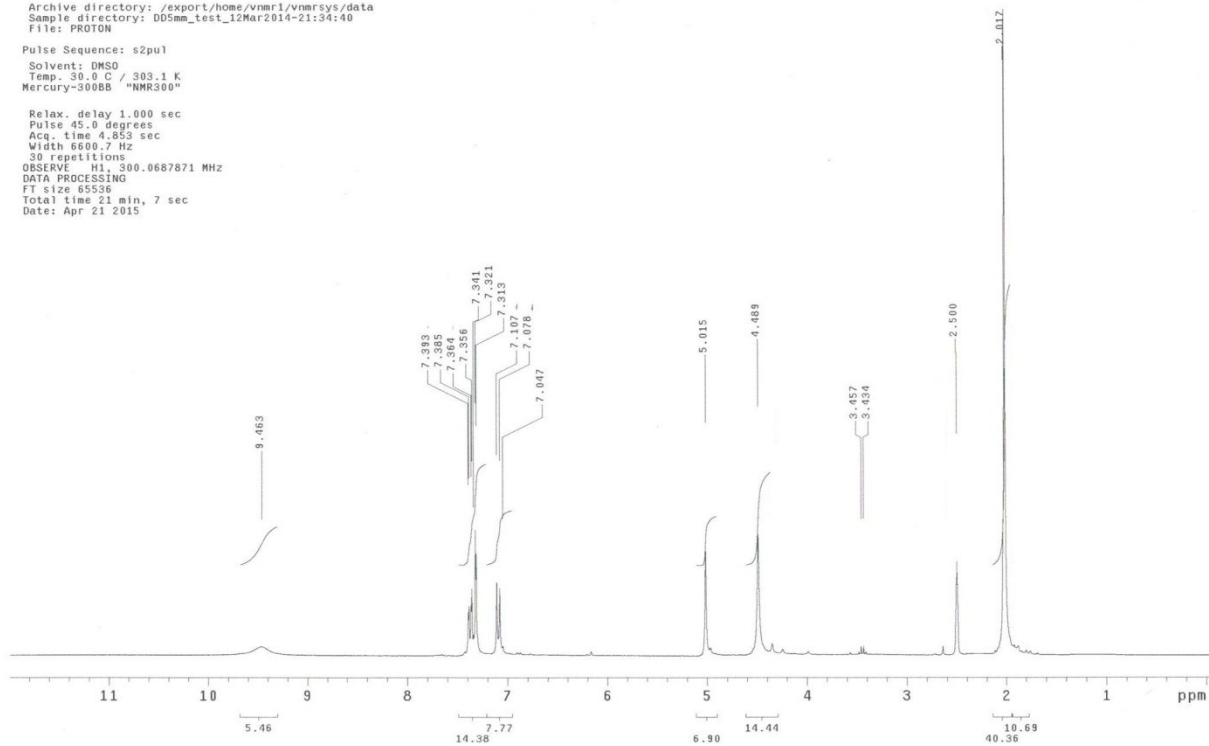

# <sup>1</sup>H NMR spectrum of compound 5c

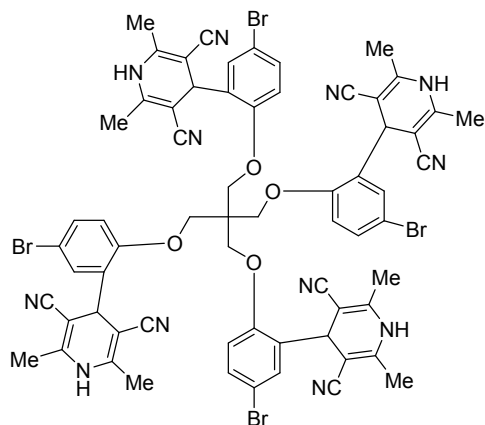

5c

AhmadHelmy-A9-DMSO-G13  
Archive directory: /export/home/vnmr1/vnmrsys/data  
Sample directory: DD5mm\_test\_12Mar2014-21:54:40  
File: PROTON

Pulse Sequence: s2pu1  
Solvent: DMSO  
Temp: 30.0 C / 303.1 K  
Mercury-300SB "NMR300"

Pulse 45.0 degrees  
Acq. time 1.815 sec  
Width 18781.7 Hz  
2812 repetitions  
OBSERVE G13, 75.4523854 MHz  
DECOUPLE H1, 300.0702830 MHz  
Power 39 dB  
continuous ly on  
WALTZ-16 modulated  
DATA PROCESSING  
Line broadening 1.0 Hz  
FT size 191072  
Total time 9 hr, 17 min, 51 sec  
Date: Apr 22 2015

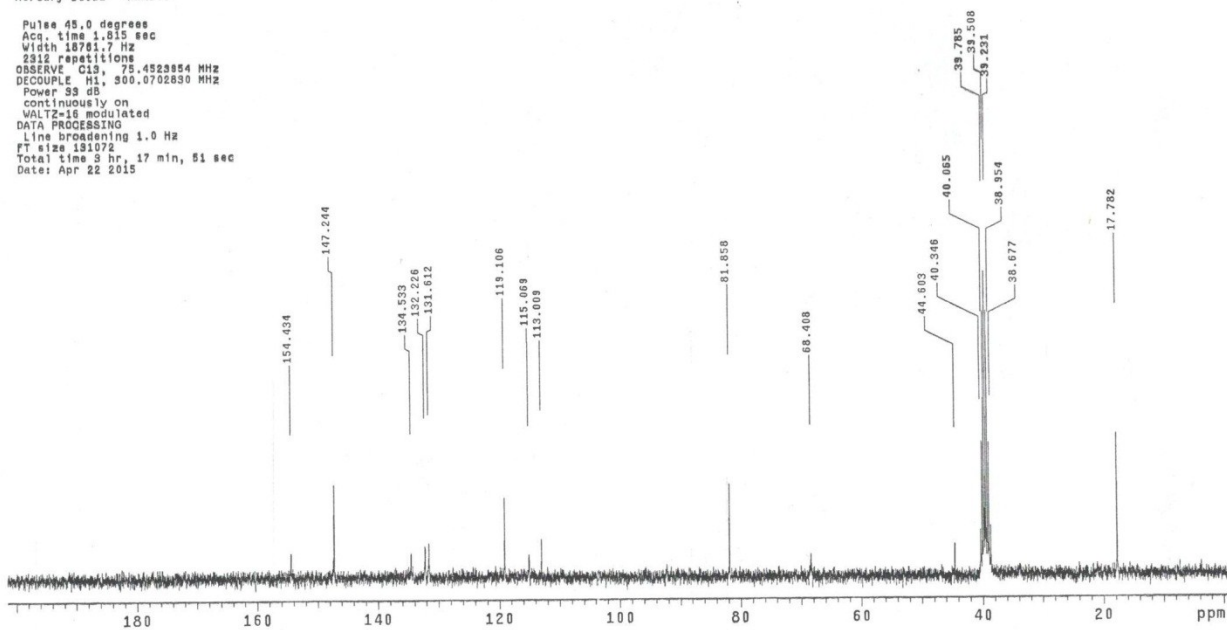

# <sup>13</sup>C NMR spectrum of compound 5c

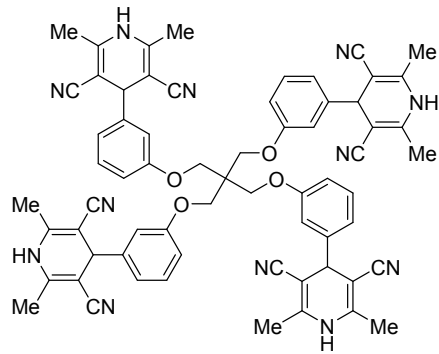

5d

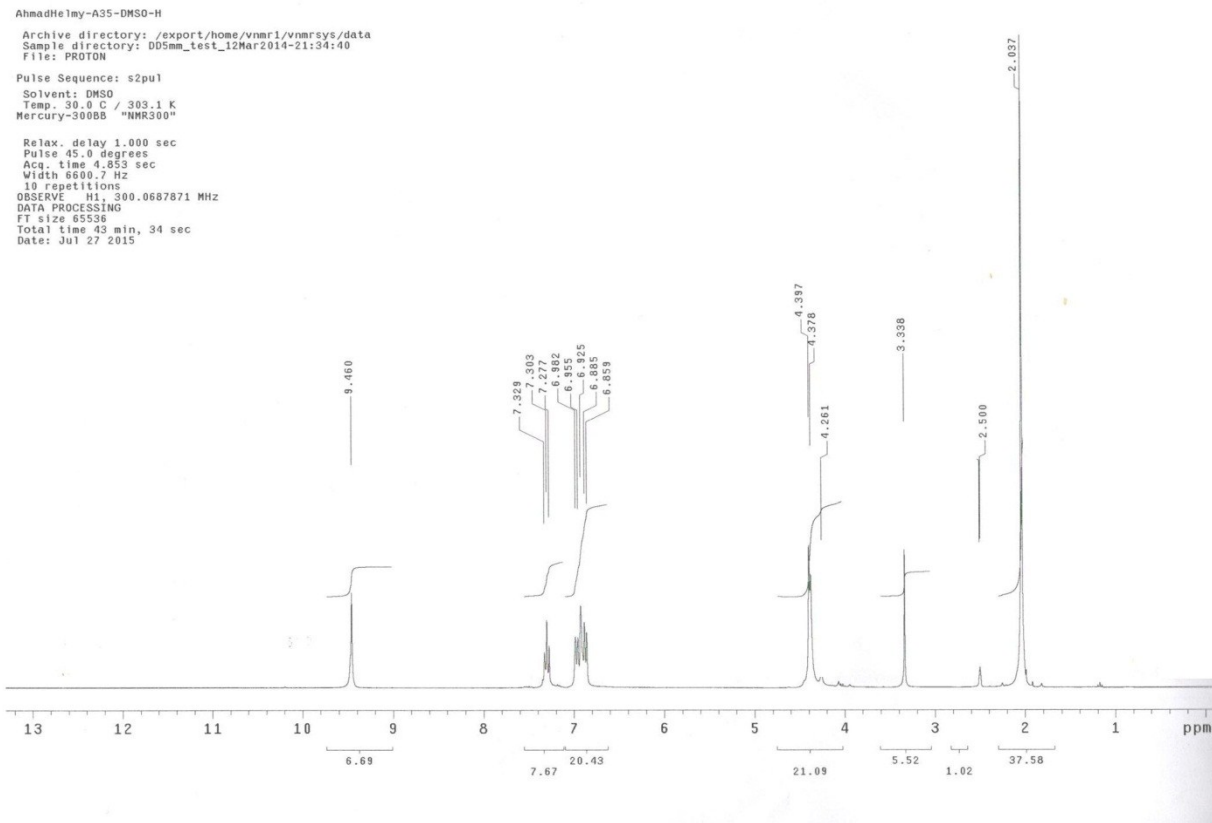

<sup>1</sup>H NMR spectrum of compound 5d

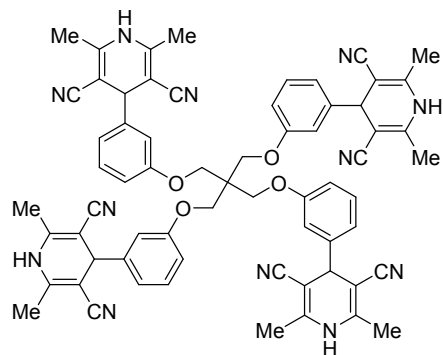

5d

AhmadHemy-A35-1-DMSO-C13

Archive directory: /export/home/vnmr1/vnmrSYS/data  
 Sample directory: DDSmm\_test\_12Mar2014-21:34:40  
 File: PROTON

Pulse Sequence: s2pu1  
 Solvent: DMSO  
 Temp: 30.0 C / 303.1 K  
 Mercury-300BB "NMR300"

Pulse 45.0 degrees  
 Acq. time 1.815 sec  
 Width 18761.7 Hz  
 584 repetitions  
 OBSERVE C13, 75.4523954 MHz  
 DECOUPLE H1, 300.0702830 MHz  
 Power 53 dB  
 continuously on  
 WALTZ-16 modulated  
 DATA PROCESSING  
 Line broadening 1.0 Hz  
 FT size 151072  
 Total time 3 hr, 17 min, 51 sec  
 Date: Jul 27 2015

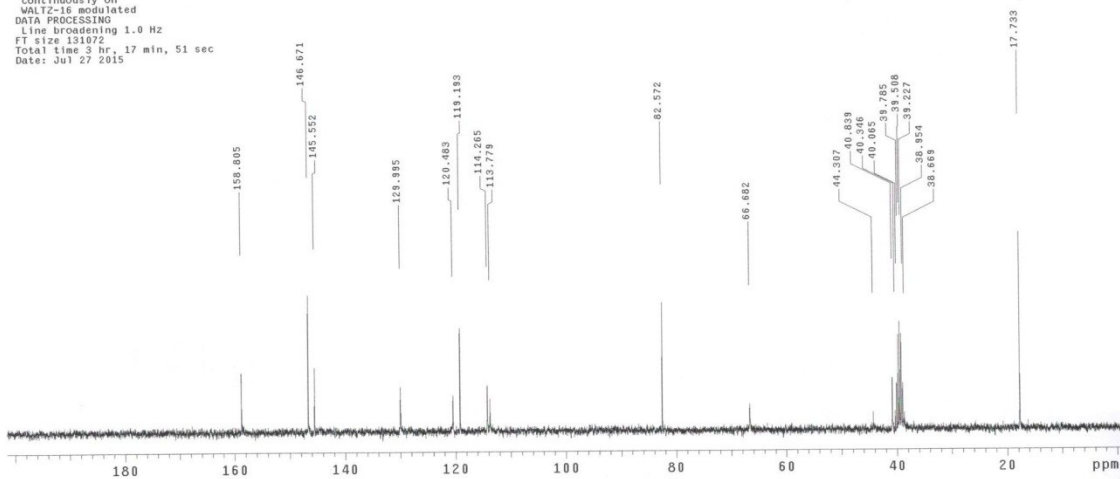

<sup>13</sup>CNMR spectrum of compound 5d
